# Supplementary material for: Electrospinning chiral fluorescent nanofibers from helical polyacetylene: preparation and enantioselective recognition ability
Source: Royal Society of Chemistry journal article supplement (doi:10.1039/d0na00127a), 2020-01-01
Supplement: d0na00127a1.pdf [file d0na00127a1.pdf]

## Supporting Information

### **Electrospinning chiral fluorescent nanofibers from helical polyacetylene: preparation and enantioselective recognition ability**

*Jiali Yang,<sup>a,b</sup> Pengpeng Li,<sup>a,b</sup> Biao Zhao,<sup>b</sup> Kai Pan<sup>\*b</sup> and Jianping Deng<sup>\*a,b</sup>*

<sup>a</sup> State Key Laboratory of Chemical Resource Engineering, Beijing University of Chemical Technology, Beijing 100029, China. E-mail: dengjp@mail.buct.edu.cn.

<sup>b</sup> College of Materials Science and Engineering, Beijing University of Chemical Technology, Beijing 100029, China.

E-mail: dengjp@mail.buct.edu.cn

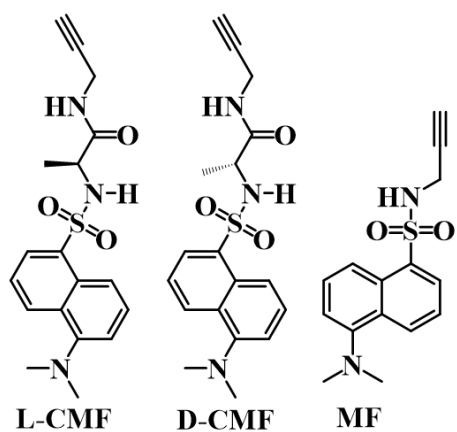

**Figure S1.** Structural formula of three monomers.

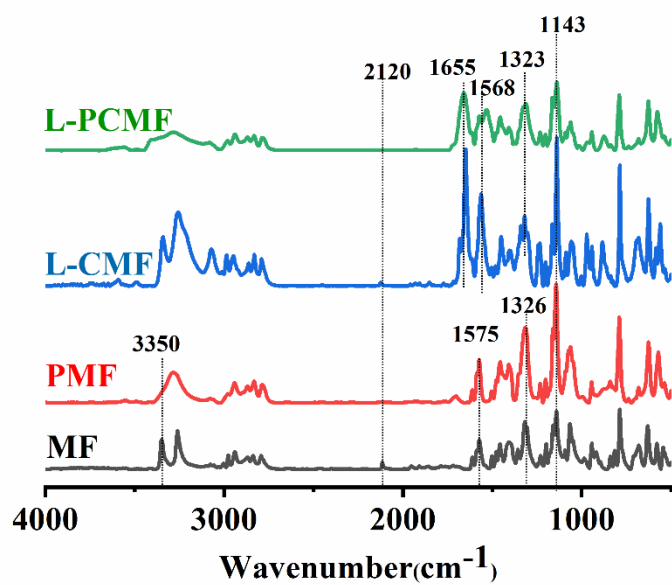

**Figure S2.** FT-IR spectra of the fluorescent monomers and their corresponding polymers.

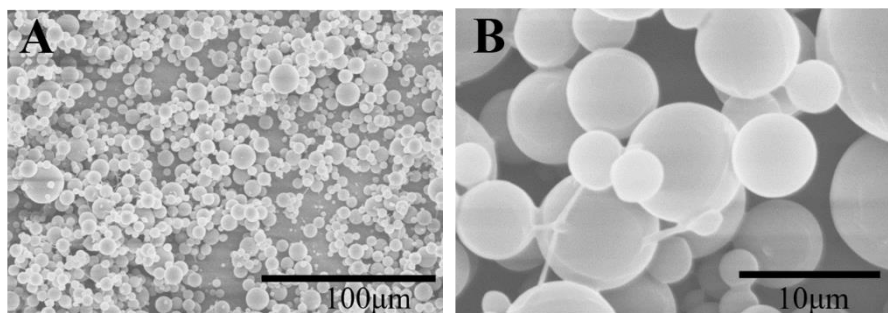

**Figure S3.** SEM images of electrospinning of the L-PCMF polymer dissolved in DMF (Maximum solubility mass volume fraction is 30%).

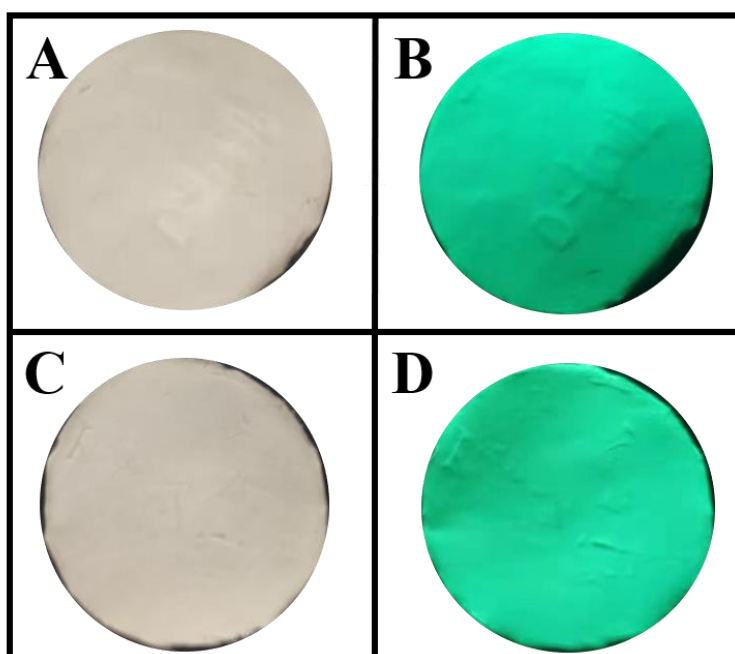

**Figure. S4.** Digital photo of fluorescent polymer membranes:(A) the L-PCMF membrane under sunlight; (B) the L-PCMF membrane under UV light at 365 nm wavelength; (C) the PMF membrane under sunlight; (D) the PMF membrane under UV light at 365 nm wavelength.

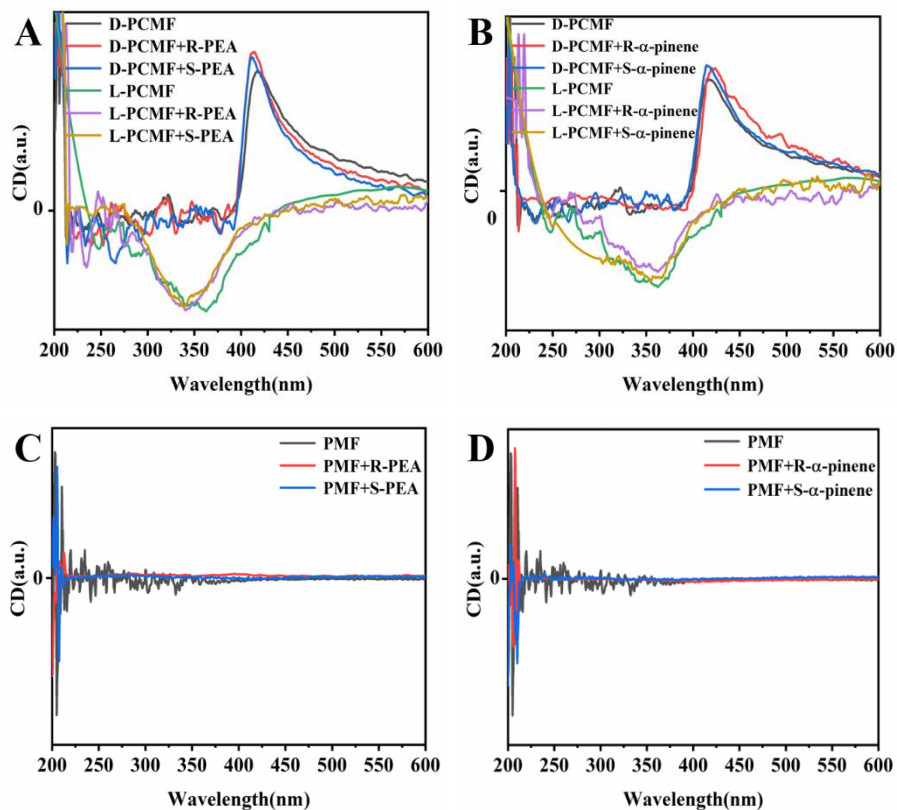

**Figure S5.** CD absorption of fluorescent membrane before and after the addition of different enantiomers to small molecules. A qualitative test of the electrospinning membranes that infiltrates in toluene; A drop of toluene solution on a circular electrospinning membrane with a diameter of 1 cm.

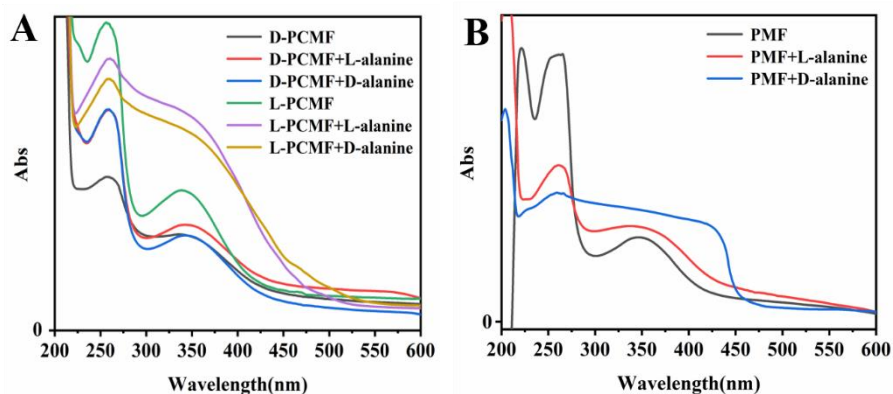

**Figure S6.** UV-vis absorption of fluorescent membranes before and after addition of small molecule alanine enantiomers: (A) UV-vis absorption spectrum of chiral fluorescent membrane before and after alanine enantiomer; (B) UV-vis absorption spectra of achiral fluorescent membranes before and after alanine enantiomers.

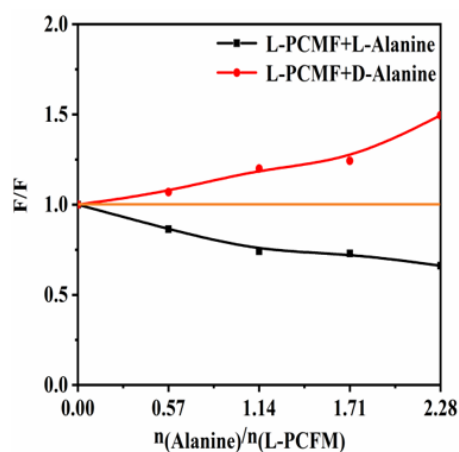

**Figure S7.** Fluorescence emission relative spectra of fluorescent membranes upon adding of small molecule alanine enantiomer:  $4.77 \times 10^{-7}$ ,  $9.53 \times 10^{-7}$ ,  $1.43 \times 10^{-6}$ ,  $1.91 \times 10^{-6}$  mol.

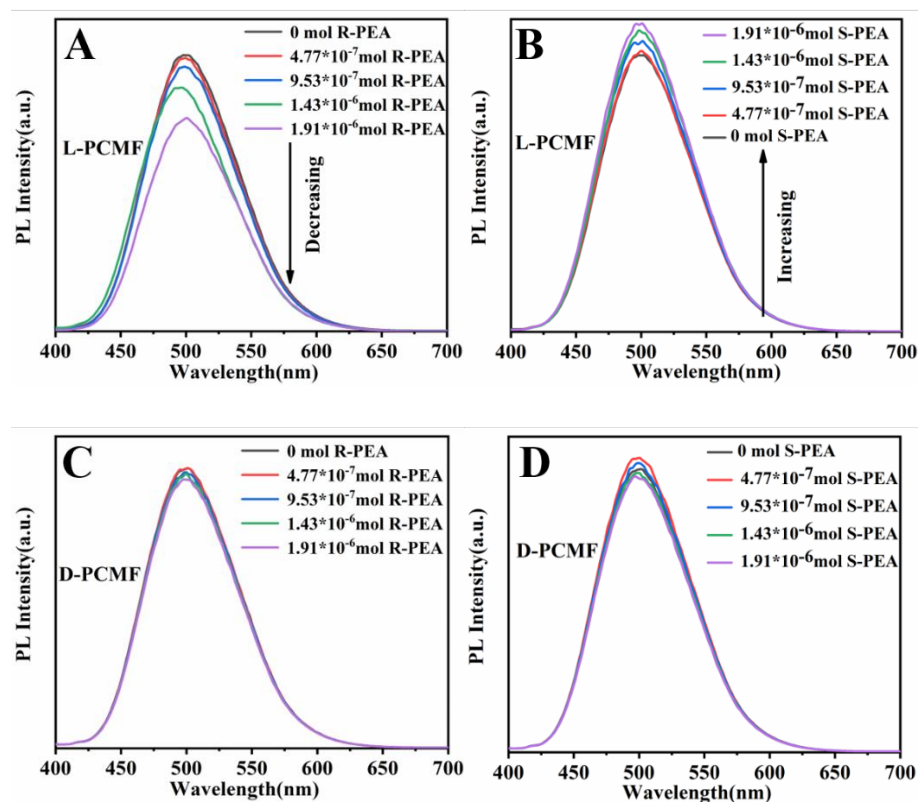

**Figure S8.** Fluorescence emission spectra of recognition of small molecule Phenethylamine enantiomer by chiral fluorescent polymer membranes: (A) the recognition of R-PEA by L-PCMF membrane; (B) the recognition of S-PEA by L-PCMF membrane; (C) the recognition of R-PEA by D-PCMF membrane; (D) the recognition of S-PEA by D-PCMF membrane.

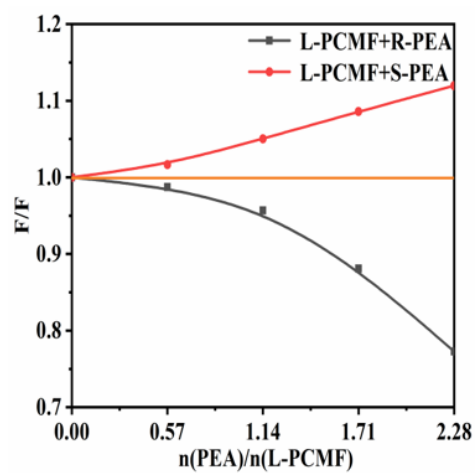

**Figure S9.** Fluorescence emission relative spectra of fluorescent membranes upon adding of small molecule phenylethylamide enantiomer:  $4.77 \times 10^{-7}$ ,  $9.53 \times 10^{-7}$ ,  $1.43 \times 10^{-6}$ ,  $1.91 \times 10^{-6}$  mol.

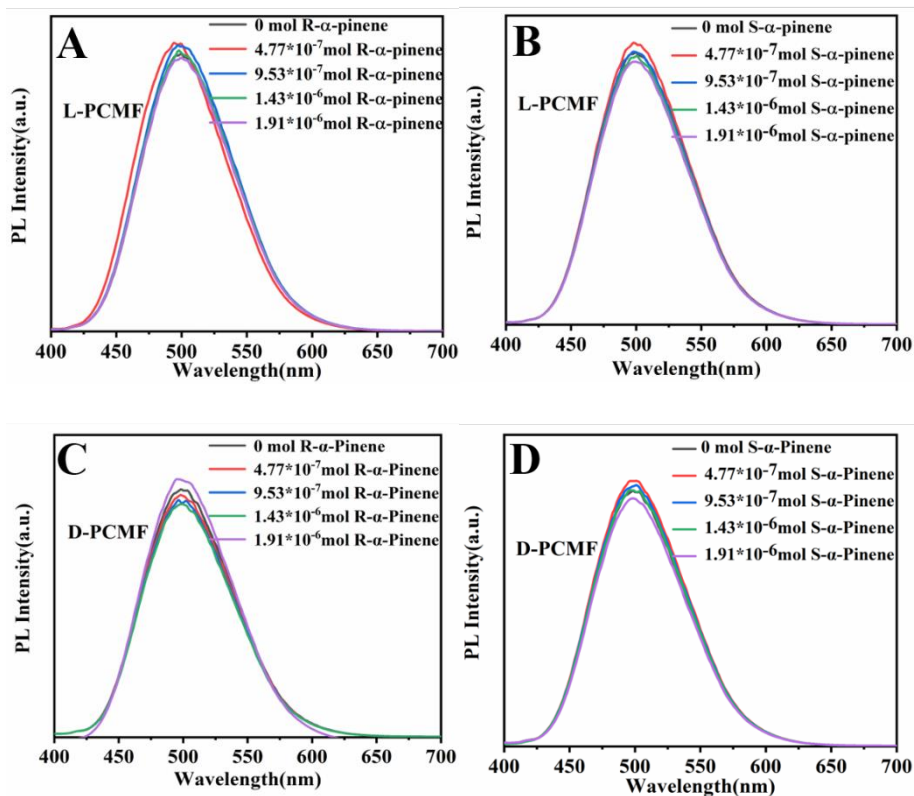

**Figure S10.** Fluorescence emission spectra of recognition of small molecule Pinene enantiomer by chiral fluorescent polymer membranes: (A) the recognition of R- $\alpha$ -pinene by L-PCMF membrane; (B) the recognition of S- $\alpha$ -pinene by L-PCMF membrane; (C) the recognition of R- $\alpha$ -pinene by D-PCMF membrane; (D) the recognition of S- $\alpha$ -pinene by D-PCMF membrane.

**Table S1.** Data for the prepared fluorescent polyacetylenes

| polymer | $M_n^a$ | $M_w/M_n^a$ | Cotton effect |
|---------|---------|-------------|---------------|
| L-PCMF  | 7200    | 1.74        | yes           |
| D-PCMF  | 6700    | 1.74        | yes           |
| PMF     | 2000    | 1.53        | no            |

<sup>a</sup> Determined by GPC(polystyrenes as standards, THF as eluent).

**Table S2** Electrospinning parameters

| Substance | Working distance<br>(cm) | Flow rate<br>(mL/h) | Spinning voltage<br>(kV) | Temperature<br>(°C) | Humidity<br>(%RH) |
|-----------|--------------------------|---------------------|--------------------------|---------------------|-------------------|
| L-PCMF    | 15                       | 0.2                 | 10                       | 25                  | 30                |
| D-PCMF    | 15                       | 0.2                 | 11                       | 25                  | 30                |
| PMF       | 15                       | 0.2                 | 9                        | 25                  | 30                |
